# Supplementary material
Source: PubMed Central journal article supplement (PMC4756584)
Supplement: NIHMS758866-supplement-Supplemental_2.pdf [file NIHMS758866-supplement-Supplemental_2.pdf]

**Supplementary Table S1 – Inflammatory cytokine response to early insulin administration**

|                                     | IL-1 $\beta$<br>(x10 <sup>3</sup> pg/mL) | IL-6<br>(x10 <sup>5</sup> pg/mL) | IL-10<br>(x10 <sup>3</sup> pg/mL) | TNF- $\alpha$<br>(x10 <sup>3</sup> pg/mL) |
|-------------------------------------|------------------------------------------|----------------------------------|-----------------------------------|-------------------------------------------|
| <b>CLP-D25<br/>(n=35)</b>           | 1.6 $\pm$ 0.2                            | 1.03 $\pm$ 0.25                  | 9.1 $\pm$ 1.5                     | 1.3 $\pm$ 0.2                             |
| <b>CLP-D25 + Insulin<br/>(n=15)</b> | 1.8 $\pm$ 0.05                           | 0.41 $\pm$ 0.001                 | 16.2 $\pm$ 0.9*                   | 1.8 $\pm$ 0.03                            |

Data are presented as mean  $\pm$  SEM. Differences were assessed by Student's t-test.

\* p < 0.05 compared to CLP-D25 mice
