# Supplementary material
Source: PubMed Central journal article supplement (PMC4756584)

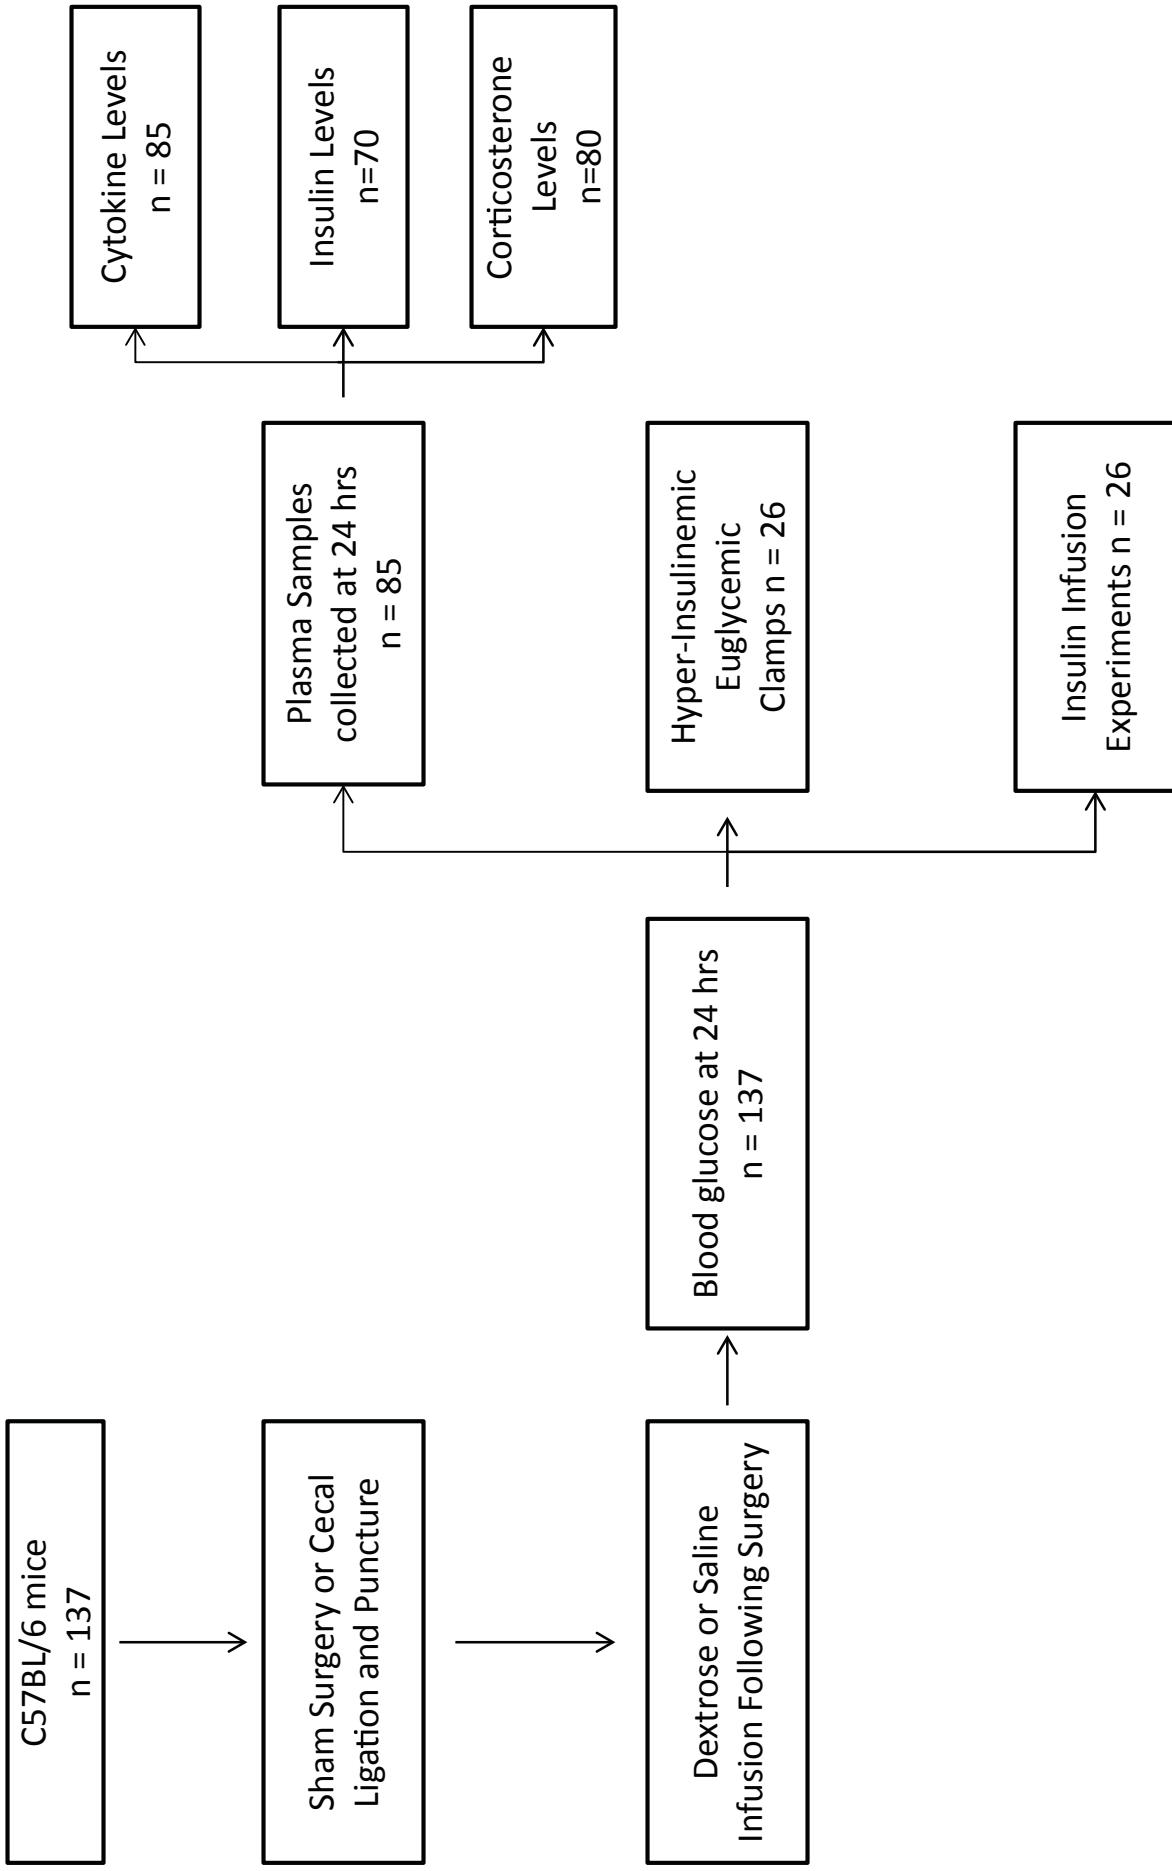

Supplementary Figure S1 – Schematic of research protocol

Supplement: NIHMS758866-supplement-Supplemental_1.pdf [file NIHMS758866-supplement-Supplemental_1.pdf]
